# Supplementary material for: Child Distress Expression and Regulation Behaviors: A Systematic Review and Meta-Analysis
Source: MDPI journal article supplement (doi:10.3390/children9020174), 2022-02-01
Supplement: s1 [file s1]

## Supplemental File S2: Systematic Search Strategies

### Search Results

| Database [Platform] <i>January 25, 2018</i>                                                                                                                | Results |
|------------------------------------------------------------------------------------------------------------------------------------------------------------|---------|
| <b>MEDLINE</b><br>Ovid MEDLINE(R) Epub Ahead of Print, In-Process & Other Non-Indexed Citations, Ovid MEDLINE(R) Daily and Ovid MEDLINE(R) 1946 to Present | 6674    |
| <b>Embase Classic+Embase</b> 1974 to 1947 to 2019 Week 04                                                                                                  | 8825    |
| <b>PscyINFO</b>                                                                                                                                            | 3208    |

### MEDLINE

Database(s): **Ovid MEDLINE(R) and Epub Ahead of Print, In-Process & Other Non-Indexed Citations and Daily** 1946 to January 25, 2019  
Search Strategy:

| #  | Searches                                                                                                                                   | Results |
|----|--------------------------------------------------------------------------------------------------------------------------------------------|---------|
| 1  | emotions/ or expressed emotion/ or (emotion or emotions or emotional).tw,kf.                                                               | 191679  |
| 2  | stress, psychological/ or (stress or stresses).tw,kf.                                                                                      | 751508  |
| 3  | irritable mood/ or (irritable or irritability).tw,kf.                                                                                      | 23335   |
| 4  | affect/ or (affect or mood or moods or negative reactivity or sad or sadness).tw,kf.                                                       | 690904  |
| 5  | anger/ or (tantrum or tantrums or anger*).tw,kf.                                                                                           | 17399   |
| 6  | fear/ or fear*.tw,kf.                                                                                                                      | 83195   |
| 7  | frustration/ or frustrat*.tw,kf.                                                                                                           | 17500   |
| 8  | pain/ or acute pain/ or (pain or pains or distress*).tw,kf.                                                                                | 711933  |
| 9  | or/1-8                                                                                                                                     | 2236871 |
| 10 | child, preschool/ or exp infant/ or pediatrics/                                                                                            | 1527594 |
| 11 | (infan* or newborn* or "new born*" or perinat* or neonat* or baby or baby* or babies or toddler* or prematur* or pre-term or preterm*).mp. | 1563213 |
| 12 | or/10-11                                                                                                                                   | 1987661 |
| 13 | (regulation or regulatory).tw,kf.                                                                                                          | 1039331 |
| 14 | 9 and 12 and 13                                                                                                                            | 6674    |

### Embase

Database(s): **Embase Classic+Embase** 1947 to 2019 Week 04  
Search Strategy:

| # | Searches                                                                             | Results |
|---|--------------------------------------------------------------------------------------|---------|
| 1 | emotion/ or (emotion or emotions or emotional).tw,kw.                                | 264584  |
| 2 | mental stress/ or (stress or stresses).tw,kw.                                        | 954790  |
| 3 | irritability/ or (irritable or irritability).tw,kw.                                  | 52347   |
| 4 | affect/ or (affect or mood or moods or negative reactivity or sad or sadness).tw,kw. | 885570  |

## Supplemental File S2: Systematic Search Strategies

|    |                                                                                                                                            |         |
|----|--------------------------------------------------------------------------------------------------------------------------------------------|---------|
| 5  | anger/ or (tantrum or tantrums or anger*).tw,kw.                                                                                           | 26078   |
| 6  | fear/ or fear*.tw,kw.                                                                                                                      | 115395  |
| 7  | frustration/ or frustrat*.tw,kw.                                                                                                           | 21682   |
| 8  | pain/ or (pain or pains or distress*).tw,kw.                                                                                               | 1096725 |
| 9  | or/1-8                                                                                                                                     | 3062910 |
| 10 | child, preschool/ or exp infant/ or pediatrics/                                                                                            | 1395661 |
| 11 | (infan* or newborn* or "new born*" or perinat* or neonat* or baby or baby* or babies or toddler* or prematur* or pre-term or preterm*).mp. | 1716033 |
| 12 | or/10-11                                                                                                                                   | 1999185 |
| 13 | (regulation or regulatory).tw,kw.                                                                                                          | 1290962 |
| 14 | 9 and 12 and 13                                                                                                                            | 8825    |

### PsycINFO

Database(s): **PsycINFO** 1806 to January Week 3 2019

Search Strategy:

| #  | Searches                                                                                                                                   | Results |
|----|--------------------------------------------------------------------------------------------------------------------------------------------|---------|
| 1  | emotions/ or (emotion or emotions or emotional).tw,id.                                                                                     | 293849  |
| 2  | psychological stress/ or (stress or stresses).tw,id.                                                                                       | 213337  |
| 3  | (irritable or irritability).tw,id.                                                                                                         | 8761    |
| 4  | (affect or mood or moods or negative reactivity or sad or sadness).tw,id.                                                                  | 256250  |
| 5  | anger/ or (tantrum or tantrums or anger*).tw,id.                                                                                           | 30121   |
| 6  | fear/ or fear*.tw,id.                                                                                                                      | 78467   |
| 7  | frustration/ or frustrat*.tw,id.                                                                                                           | 17706   |
| 8  | pain/ or (pain or pains or distress*).tw,id.                                                                                               | 152930  |
| 9  | or/1-8                                                                                                                                     | 844282  |
| 10 | preschool students/ or pediatrics/                                                                                                         | 33499   |
| 11 | (infan* or newborn* or "new born*" or perinat* or neonat* or baby or baby* or babies or toddler* or prematur* or pre-term or preterm*).mp. | 147940  |
| 12 | or/10-11                                                                                                                                   | 178212  |
| 13 | (regulation or regulatory).tw,id.                                                                                                          | 102997  |
| 14 | 9 and 12 and 13                                                                                                                            | 3208    |
