# Supplementary material for: Child Distress Expression and Regulation Behaviors: A Systematic Review and Meta-Analysis
Source: MDPI journal article supplement (doi:10.3390/children9020174), 2022-02-01
Supplement: s1 [file s1]

**Supplemental Table 3.** *Summary of Results from Studies Assessing Self-Soothing Strategies Separated by Age.*

| Study                       | Year 1                |             | Year 2      |            | Year 3      |             |
|-----------------------------|-----------------------|-------------|-------------|------------|-------------|-------------|
|                             | Analysis              | Result      | Analysis    | Result     | Analysis    | Result      |
| Bridges (1997)              |                       |             | Correlation | $r = 0.25$ |             |             |
| Beijers (2017)              |                       |             | Correlation | $r = 0.20$ |             |             |
| Premo (2014)                |                       |             |             |            | Correlation | $r = 0.00$  |
| Diener (2002)               |                       |             | Correlation | $r = 0.17$ |             |             |
| Geangu (2011)               | T Test<br>(Converted) | $r = -0.47$ |             |            |             |             |
| Sheese (2008)               | Correlation           | $r = 0.08$  |             |            |             |             |
| Thomas (2017)               | Correlation           | $r = -0.12$ |             |            |             |             |
| Gill (2003)                 |                       |             |             |            | Correlation | $r = 0.05$  |
| Braungart-<br>Rieker (1998) | Correlation           | $r = -0.39$ |             |            |             |             |
| Grolnick (1996)             |                       |             |             |            | Correlation | $r = 0.00$  |
| Graziano (2011)             |                       |             |             |            | Correlation | $r = -0.32$ |
| Ross (1999)                 |                       |             | Correlation | $r = 0.47$ |             |             |
