# Supplementary material for: Child Distress Expression and Regulation Behaviors: A Systematic Review and Meta-Analysis
Source: MDPI journal article supplement (doi:10.3390/children9020174), 2022-02-01
Supplement: s1 [file s1]

**Supplemental Table 2.** *Summary of Results from Studies Assessing Parent-Focused Strategies Separated by Age.*

| Study                   | Year 1      |             | Year 2      |             | Year 3      |            |
|-------------------------|-------------|-------------|-------------|-------------|-------------|------------|
|                         | Analysis    | Result      | Analysis    | Result      | Analysis    | Result     |
| Moscardino (2006)       | Correlation | $r = 0.39$  |             |             |             |            |
| Bridges (1997)          |             |             | Correlation | $r = 0.57$  |             |            |
| Swingler (2014)         | Correlation | $r = 0.14$  |             |             |             |            |
| Haley (2003)            | Correlation | $r = -0.11$ |             |             |             |            |
| Premo (2014)            |             |             |             |             | Correlation | $r = 0.06$ |
| Ekas (2011)             |             |             | Correlation | $r = 0.40$  |             |            |
| Braungart (1991)        |             |             | Correlation | $r = 0.39$  |             |            |
| Diener (2002)           |             |             | Correlation | $r = 0.15$  |             |            |
| Suurland (2017)         | Correlation | $r = -0.28$ |             |             |             |            |
| Gustafsson (2018)       | Correlation | $r = -0.26$ |             |             |             |            |
| August (2017)           | Correlation | $r = 0.36$  |             |             |             |            |
| Braungart-Rieker (1998) | Correlation | $r = -0.31$ |             |             |             |            |
| Calkins (1998)          |             |             | Correlation | $r = -0.61$ |             |            |

|                 |             |           |             |             |             |          |
|-----------------|-------------|-----------|-------------|-------------|-------------|----------|
| Graziano (2011) |             |           | Correlation |             | r = 0.39    |          |
| Buss (1998)     | Correlation | r = 0.38  |             |             |             |          |
| Mayes (1990)    | Correlation | r = -0.19 |             |             |             |          |
| Calkins (1999)  |             |           |             | Correlation | r = -0.26   |          |
| Wu (2020)       | Correlation | r = 0.11  | Correlation | r = 0.15    | Correlation | r = 0.18 |
| Kogan (1996)    | Correlation | r = -0.16 |             |             |             |          |
| Hepworth (2020) |             |           | Correlation | r = 0.35    |             |          |
