# Supplementary material for: Child Distress Expression and Regulation Behaviors: A Systematic Review and Meta-Analysis
Source: MDPI journal article supplement (doi:10.3390/children9020174), 2022-02-01
Supplement: s1 [file s1]

**Supplemental Table 1.** *Summary of Results from Studies Assessing Disengagement of Attention Separated by Age.*

| Study                   | Year 1      |             | Year 2      |             | Year 3      |             |
|-------------------------|-------------|-------------|-------------|-------------|-------------|-------------|
|                         | Analysis    | Result      | Analysis    | Result      | Analysis    | Result      |
| Moscardino (2006)       | Correlation | $r = -0.30$ |             |             |             |             |
| Bridges (1997)          |             |             | Correlation | $r = -0.41$ |             |             |
| Swingler (2014)         | Correlation | $r = -0.60$ |             |             |             |             |
| Beijers (2017)          |             |             | Correlation | $r = -0.78$ |             |             |
| Premo (2014)            |             |             |             |             | Correlation | $r = 0.25$  |
| Ekas (2011)             |             |             | Correlation | $r = -0.19$ |             |             |
| Braungart (1991)        |             |             | Correlation | $r = -0.65$ |             |             |
| Diener (2002)           |             |             | Correlation | $r = -0.29$ |             |             |
| Sheese (2008)           | Correlation | $r = -0.24$ |             |             |             |             |
| Cole (2011)             |             |             | Correlation | $r = -0.30$ | Correlation | $r = -0.46$ |
| Frick (2018)            |             |             | Correlation | $r = -0.21$ |             |             |
| Buss (1998)             |             |             | Correlation | $r = -0.20$ |             |             |
| Braungart-Rieker (2010) | Correlation | $r = 0.29$  | Correlation | $r = -0.26$ |             |             |

|                             |             |             |             |             |             |             |
|-----------------------------|-------------|-------------|-------------|-------------|-------------|-------------|
| Braungart-<br>Rieker (1998) | Correlation | $r = -0.44$ |             |             |             |             |
| Calkins (1998)              |             |             | Correlation | $r = -0.60$ |             |             |
| Grolnick<br>(1996)          |             |             |             |             | Correlation | $r = -0.56$ |
| Graziano<br>(2011)          |             |             |             |             | Correlation | $r = -0.42$ |
| Ross (1999)                 |             |             | Correlation | $r = -0.70$ |             |             |
| Calkins (1999)              |             |             |             |             | Correlation | $r = -0.24$ |
| Crockenberg<br>(2007)       | Correlation | $r = -0.18$ |             |             |             |             |
| Kogan (1996)                | Correlation | $r = -0.41$ |             |             |             |             |

---
